# Supplementary material for: Genetic Landscape of Open Chromatin in Yeast
Source: PubMed Central journal article supplement (PMC3567132; doi:10.1371/journal.pgen.1003229), 2013-02-07

Figure S1

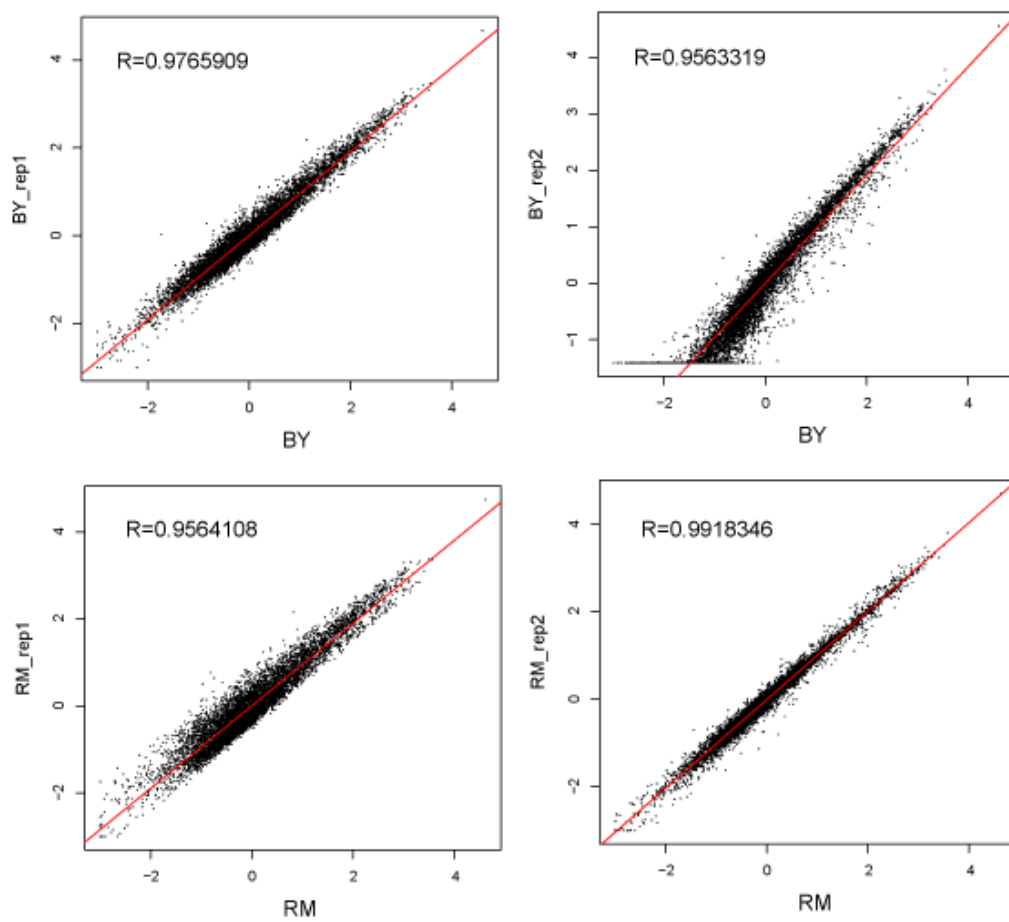

Supplement: pgen.1003229.s001.pdf [file pgen.1003229.s001.pdf]
